# Supplementary material
Source: MDPI journal article supplement (https://www.mdpi.com/2624-5175/3/4/40)
Supplement: s1 [file s1]

**Table S1.** SWA overview (median and interquartile range). Non-parametric Friedman tests were carried out ( $N = 32$ ).

|                    |           | <b>No Filter</b> | <b>Filter</b> | <b>Book</b>   | $X^2$ | $p$    |
|--------------------|-----------|------------------|---------------|---------------|-------|--------|
| Night<br>quarter 1 | Frontal   | 15.43 (13.90)    | 16.46 (14.23) | 16.71 (13.64) | 7.31  | 0.026* |
|                    | Central   | 10.45 (8.55)     | 11.43 (6.38)  | 11.39 (7.52)  | 9.19  | 0.010* |
|                    | Parietal  | 7.79 (7.35)      | 8.91 (4.40)   | 8.62 (6.46)   | 9.81  | 0.007* |
|                    | Occipital | 3.28 (3.49)      | 4.65 (3.39)   | 3.97 (4.25)   | 2.31  | 0.315  |
| Night<br>quarter 2 | Frontal   | 9.43 (6.56)      | 8.61 (7.00)   | 9.61 (4.80)   | 0.81  | 0.666  |
|                    | Central   | 6.83 (4.58)      | 6.12 (3.68)   | 6.16(2.96)    | 1.31  | 0.519  |
|                    | Parietal  | 5.02 (4.53)      | 4.81 (3.14)   | 4.67 (2.59)   | 1.75  | 0.417  |
|                    | Occipital | 2.62 (2.38)      | 2.95 (2.44)   | 2.83 (1.64)   | 0.75  | 0.687  |
| Night<br>quarter 3 | Frontal   | 7.21 (4.38)      | 6.64 (3.40)   | 7.39 (4.34)   | 1.75  | 0.417  |
|                    | Central   | 5.02 (2.89)      | 4.88 (2.50)   | 5.37 (2.62)   | 3.94  | 0.140  |
|                    | Parietal  | 3.82 (2.29)      | 3.49 (2.09)   | 4.09 (1.81)   | 3.06  | 0.216  |
|                    | Occipital | 2.12 (1.97)      | 2.22 (1.63)   | 2.66 (1.60)   | 3.06  | 0.216  |
| Night<br>quarter 4 | Frontal   | 5.38 (2.81)      | 5.01 (4.51)   | 4.70 (3.16)   | 0.44  | 0.804  |
|                    | Central   | 3.95 (2.30)      | 3.74 (2.32)   | 3.72 (2.70)   | 0.06  | 0.969  |
|                    | Parietal  | 3.07 (1.83)      | 3.17 (1.98)   | 3.07 (2.39)   | 0.81  | 0.666  |
|                    | Occipital | 1.61 (1.22)      | 1.85 (1.87)   | 1.56 (1.67)   | 1.94  | 0.380  |
| Whole<br>night     | Frontal   | 10.27 (5.62)     | 10.73 (5.90)  | 10.02 (4.05)  | 10.19 | 0.006* |
|                    | Central   | 7.05 (4.24)      | 7.13 (3.31)   | 7.27 (3.02)   | 4.00  | 0.135  |
|                    | Parietal  | 5.48 (3.07)      | 5.55 (2.49)   | 5.25 (3.08)   | 7.75  | 0.021* |
|                    | Occipital | 2.63 (2.22)      | 3.11 (2.21)   | 2.78 (2.48)   | 1.75  | 0.417  |

Note. \* =  $p \leq 0.05$
